# Supplementary material for: OsRAD51 Plays a Vital Role in Promoting Homologous Recombination in Rice Meiosis
Source: MDPI journal article supplement (doi:10.3390/ijms23179906), 2022-08-31
Supplement: s1 [file s1]

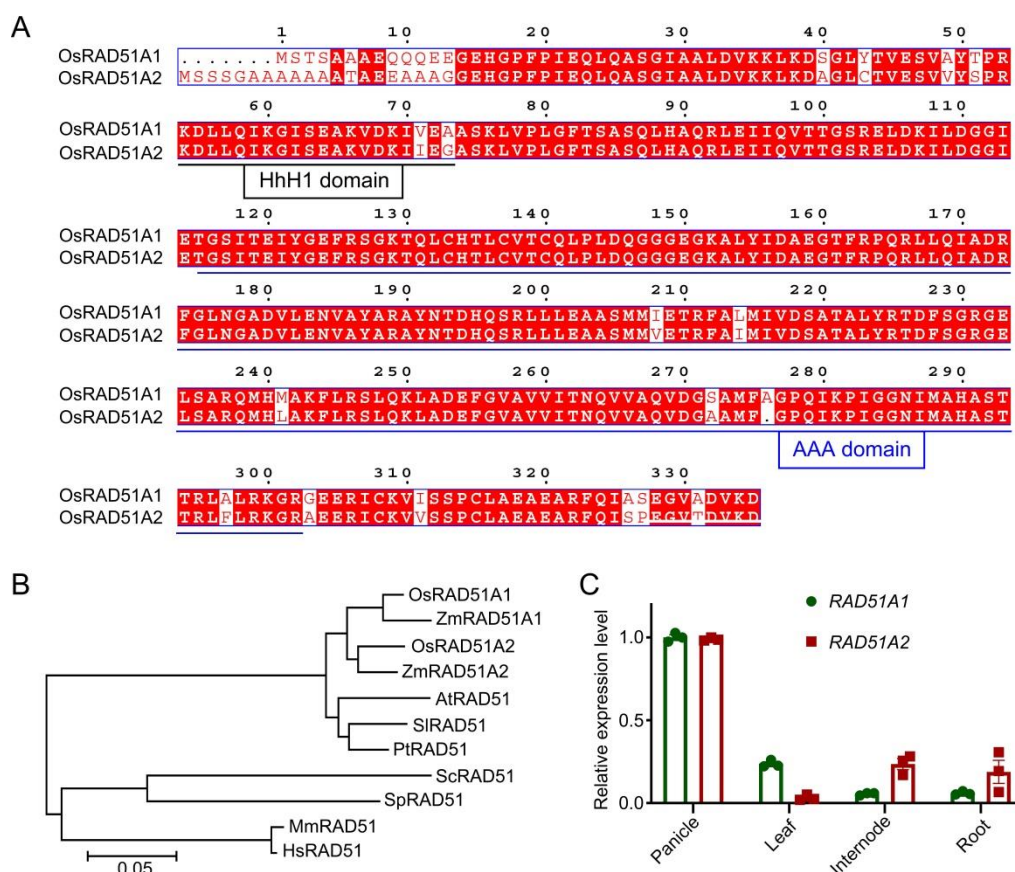

**Supplementary Figure S1. Characterization of OsRAD51.**

**A.** OsRAD51 contains an N-terminal HhH1 domain (black line) and a AAA domain (blue line). **B.** The phylogenetic tree for rice (*Oryza sativa*) OsRAD51. These proteins include OsRAD51A1 and OsRAD51A2 from *Oryza sativa*, ZmRAD51A1 and ZmRAD51A2 from *Zea mays* L., AtRAD51 from *Arabidopsis thaliana*, SIRAD51 from *Solanum lycopersicum*, PtRAD51 from *Populus trichocarpa*, ScRAD51 from *Saccharomyces cerevisiae*, SpRAD51 from *Schizosaccharomyces pombe*, MmRAD51 from *Mus musculus* and HsRAD51 from *Homo sapiens*. **C.** Real-time PCR analysis of rice (*Oryza sativa*) *OsRAD51* gene in different tissues.

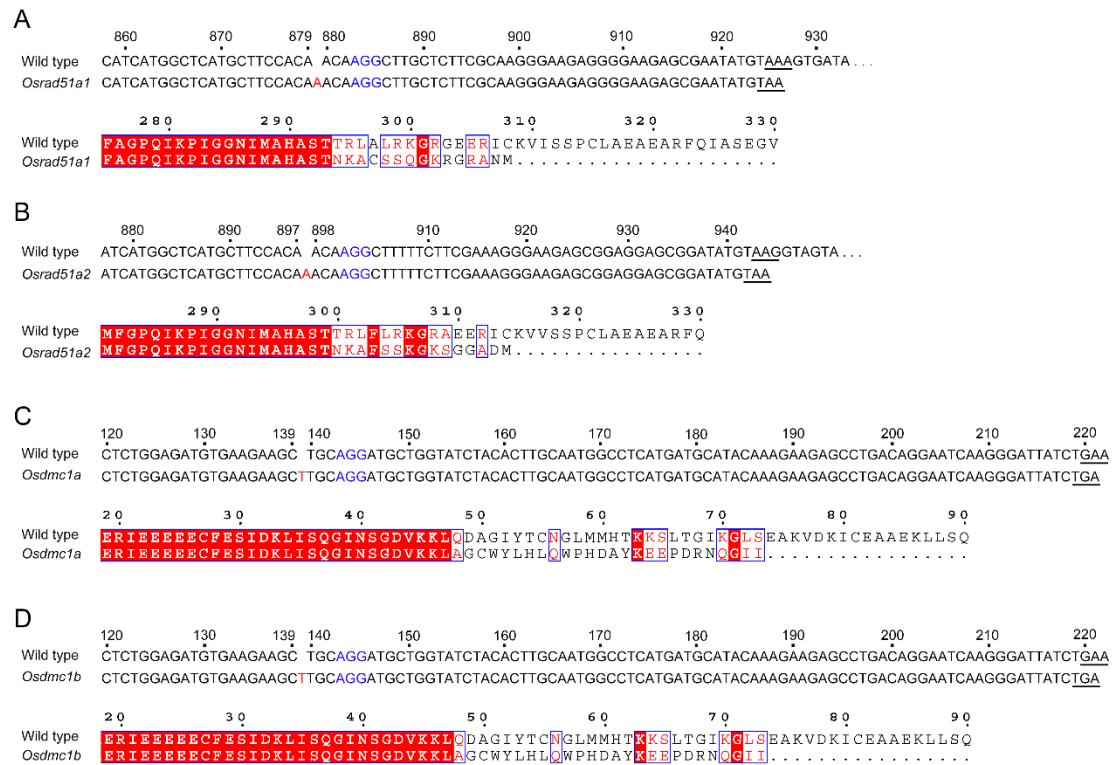

## Supplementary Figure S2. The deduced proteins in the mutants.

**A.** The deduced proteins in *Osrad51a1* mutants. **B.** The deduced proteins in *Osrad51a2* mutants. **C.** The deduced proteins in *Osdmc1a* mutants. **D.** The deduced proteins in *Osdmc1b* mutants.

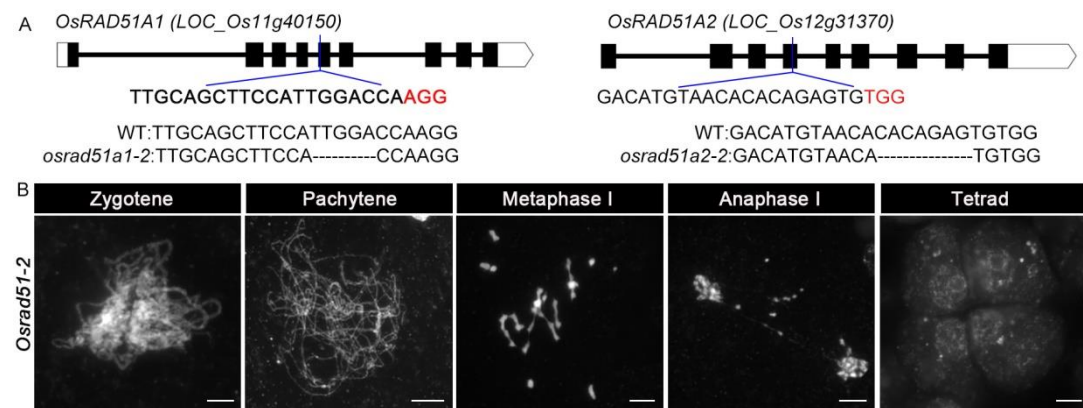

**Supplementary Figure S3. Strategy of vector construction for *Osrad51-2* (A) and meiotic chromosome behaviors in *Osrad51-2* PMCs (B). Bars, 5  $\mu$ m.**

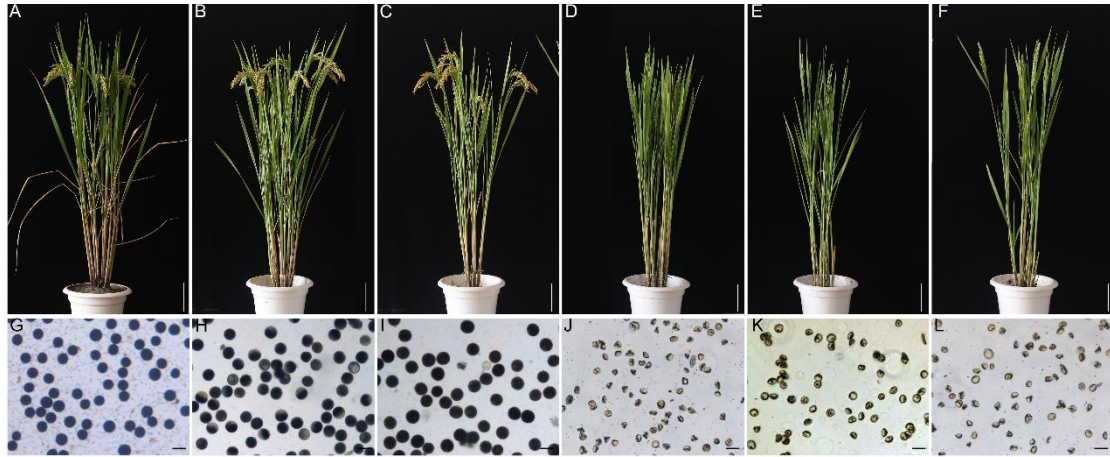

**Supplementary Figure S4. The phenotype of *Osr51*, *Osdmc1* and *Osr51 Osdmc1*.**

The representative images from WT (A), *Osr51a1* (B), *Osr51a2* (C), *Osr51* (D), *Osdmc1* (E), and *Osr51 Osdmc1* (F) mutant plant. Pollen grains stained with 1% I<sub>2</sub>-KI solution in WT (G), *Osr51a1* (H), *Osr51a2* (I), *Osr51* (J), *Osdmc1* (K), and *Osr51 Osdmc1* (L). Bars, 10 cm (A-E), 50  $\mu$ m (F-L).

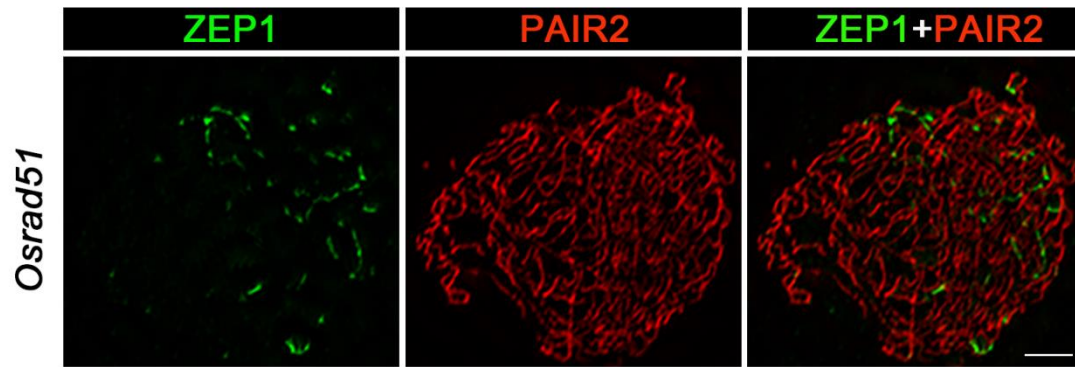

**Supplementary Figure S5. PAIR2 signal disappeared from the synapsed regions in *osrad51*.** Structured illumination microscopy is used to observe the distribution of ZEP1 (green) and PAIR2 (red) at pachytene. Bar, 5  $\mu$ m.

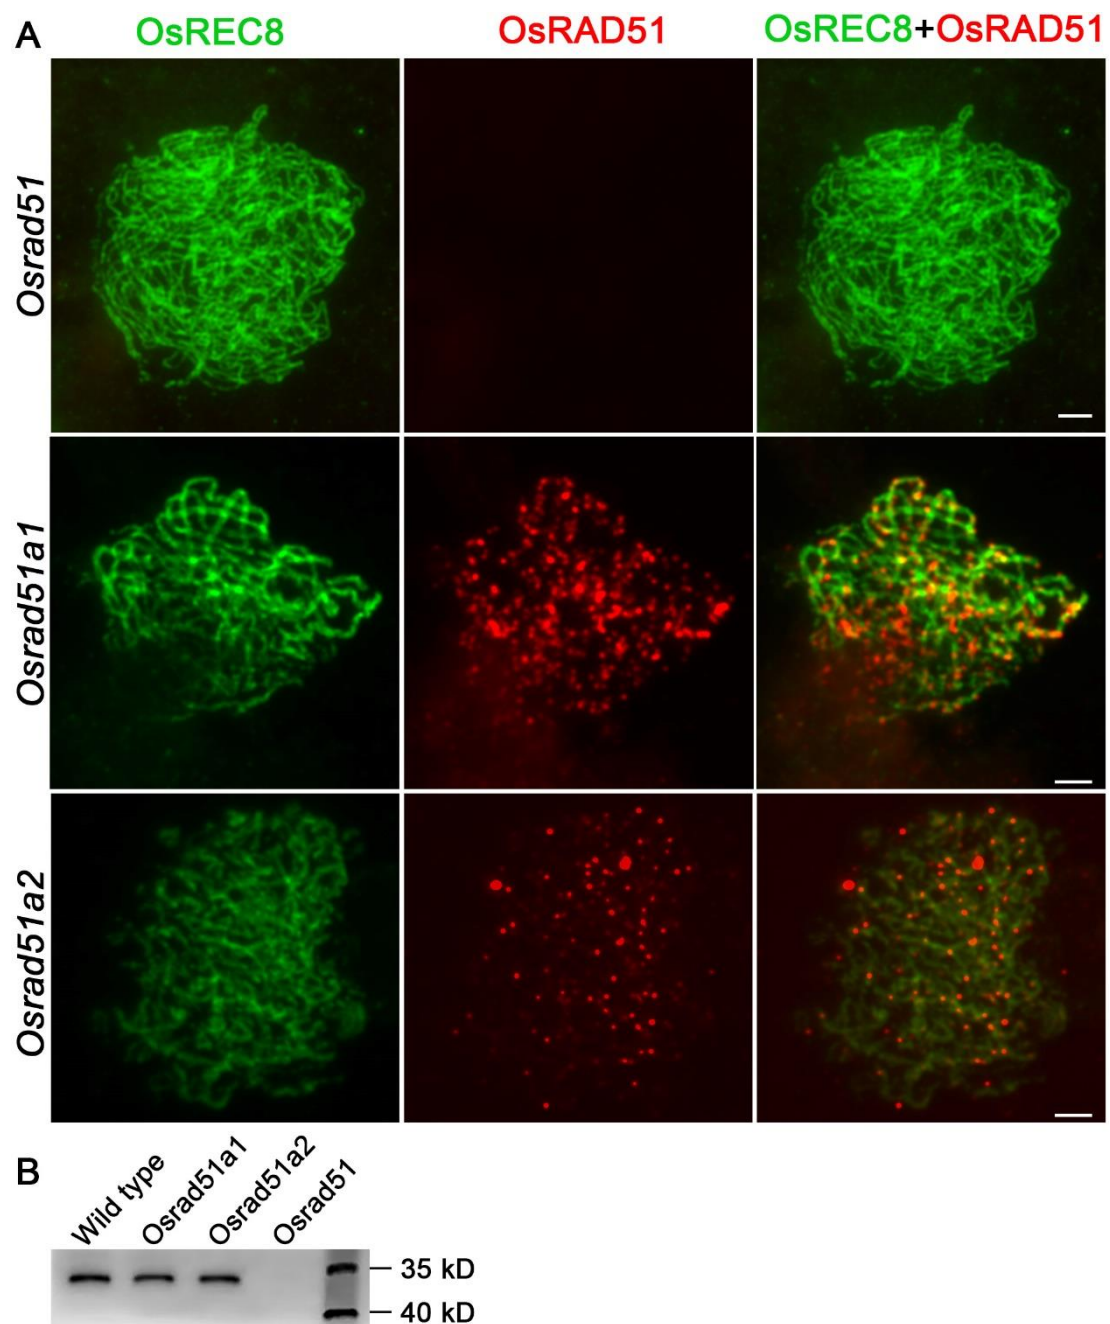

**Supplementary Figure S6. The antibody against RAD51 can specifically recognize OsRAD51A1 and OsRAD51A2 simultaneously.** (A) Immunolocalization of OsRAD51 in wild type and the *Osrad51* mutant. Bar, 5 $\mu$ m. (B) Western blot analysis using anti-OsRAD51 antibody.



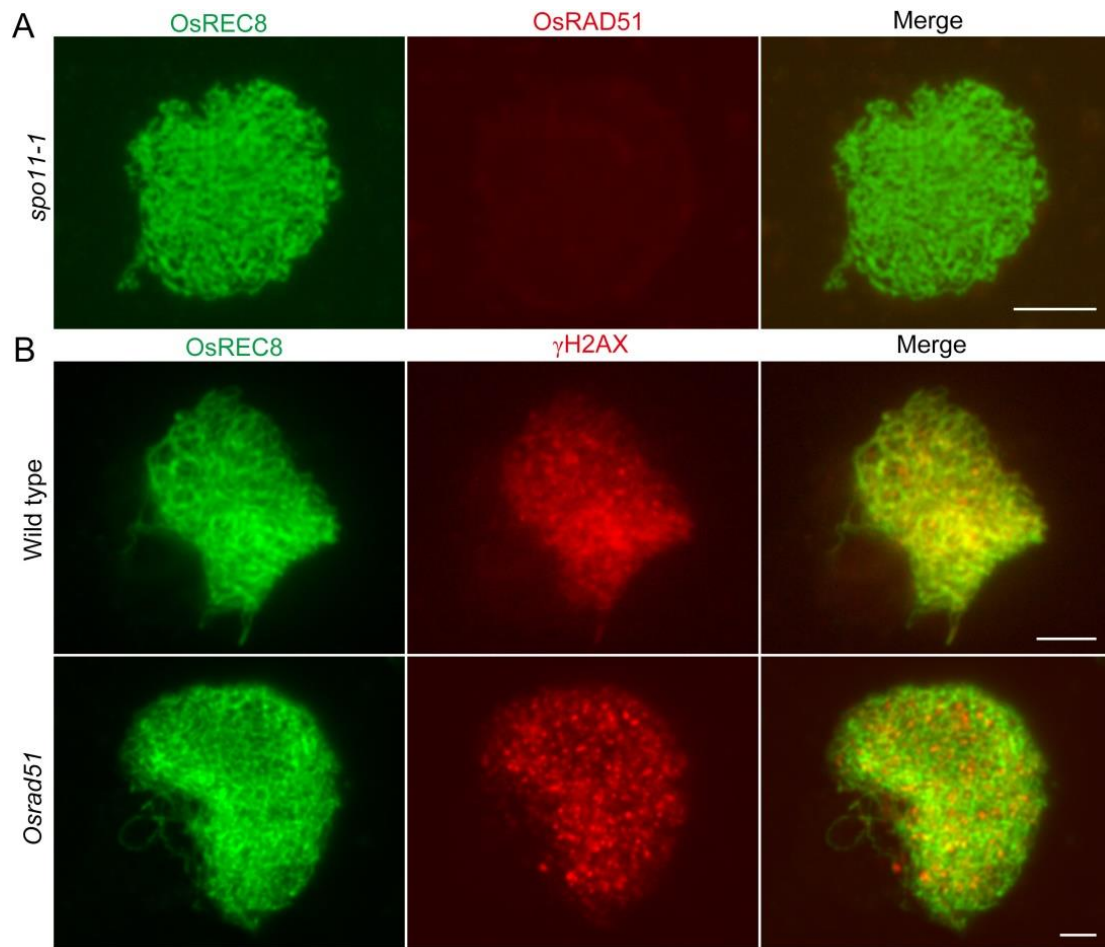

**Supplementary Figure S7. The loading of OsRAD51 depend on meiotic DSB formation**

**A.** The loading pattern of OsRAD51 in *spo11-1*. **B.** The loading pattern of  $\gamma$ H2AX in wild type and *Osrad51*. Bars, 5 $\mu$ m.

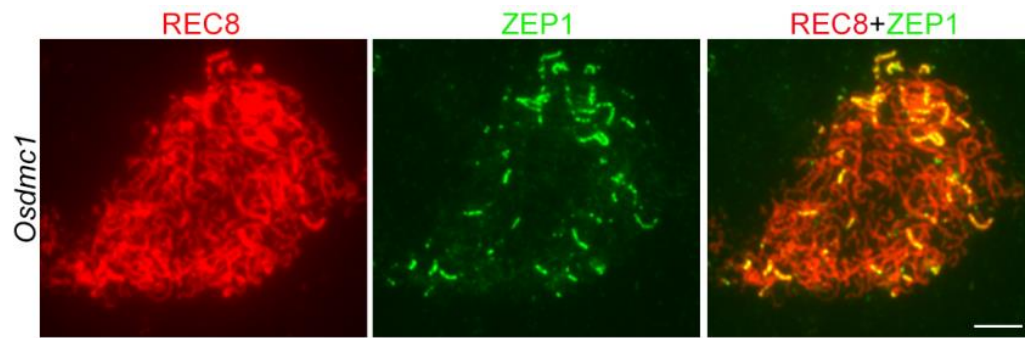

**Supplementary Figure S8. The localization of ZEP1 in *Osdmc1* appeared abnormal. Bar, 5µm.**



**Supplementary Table S1 List of primers used in this study.**

| Primer names        | Sequences(5'→3')         | Application                                                           |
|---------------------|--------------------------|-----------------------------------------------------------------------|
| RT-RAD51A1F         | TCGGGTTGAATGGTGCTGATGT   | PCR for <i>RAD51A1</i> quantification                                 |
| RT-RAD51A1R         | GTGCATTTGCCTCGCTGAGAG    | PCR for <i>RAD51A1</i> quantification                                 |
| RT-RAD51A2F         | TGGCGTGGCGGTGGTAATCA     | PCR for <i>RAD51A2</i> quantification                                 |
| RT-RAD51A2R         | ATATCCGCTCCTCCGCTCTTCC   | PCR for <i>RAD51A2</i> quantification                                 |
| ActinF              | CTGACAGGATGAGCAAGGAG     | PCR for <i>Actin</i> quantification                                   |
| ActinR              | GGCAATCCACATCTGCTGGA     | PCR for <i>Actin</i> quantification                                   |
| CrRAD51             | TGGCTCATGCTTCCACAACAAGG  | Generate Crispr/cas9 construct for <i>RAD51</i> in <i>Osrad51-1</i>   |
| CrRAD51A1-2         | TTGCAGCTTCCATTGGACCAAGG  | Generate Crispr/cas9 construct for <i>RAD51A1</i> in <i>Osrad51-2</i> |
| CrRAD51A2-2         | GACATGTAACACACAGAGTGTGG  | Generate Crispr/cas9 construct for <i>RAD51A2</i> in <i>Osrad51-2</i> |
| CrDMC1              | TGGAGATGTGAAGAAGCTGCAGG  | Generate Crispr/cas9 construct for DMC1                               |
| Cr-RAD51A1-seq-F    | TTGGAGTGGCTGTGGTTATCA    | PCR for identifying RAD51A1 mutation in <i>Osrad51-1</i>              |
| Cr-RAD51A1-seq-R    | CAATCAGCAGGAGAGCAACAC    | PCR for identifying RAD51A1 mutation in <i>Osrad51-1</i>              |
| Cr-RAD51A1-2-seq -F | ACAACTGGATCTAGAGAGCTTGAT | PCR for identifying RAD51A1 mutation in <i>Osrad51-2</i>              |
| Cr-RAD51A1-2-seq -R | CCAGCAGAAGTCTTGATTGATGA  | PCR for identifying RAD51A1 mutation in <i>Osrad51-2</i>              |
| Cr-RAD51A2-2-seq -F | TCTTGATGGTAGCCTCTTGG     | PCR for identifying RAD51A2 mutation in <i>Osrad51-2</i>              |
| Cr-RAD51A2-2-seq -R | GCAGGTCAATCTTTAGCACAAAC  | PCR for identifying RAD51A2 mutation in <i>Osrad51-2</i>              |

|                  |                                                |                                                          |
|------------------|------------------------------------------------|----------------------------------------------------------|
| Cr-RAD51A2-seq-F | TCAGAAGTTAGCGGATGAGGTA                         | PCR for identifying RAD51A2 mutation in <i>Osrad51-1</i> |
| Cr-RAD51A2-seq-R | TGCTGTATCCTGAAGGCGATT                          | PCR for identifying RAD51A2 mutation in <i>Osrad51-1</i> |
| Cr-DMC1A-seq-F   | AGTTGTTTGGTGTGATCCTGAC                         | PCR for identifying DMC1A mutation                       |
| Cr-DMC1A-seq-R   | TGTTATGAAGCCCTGACTCTGA                         | PCR for identifying DMC1A mutation                       |
| Cr-DMC1B-seq-F   | CTCCCTGGGTTTCATTCTTCAT                         | PCR for identifying DMC1B mutation                       |
| Cr-DMC1B-seq-R   | ACGCAGATCAGCTCCTATTAAC                         | PCR for identifying DMC1B mutation                       |
| BD-RAD51A1-F     | CTGATCTCAGAGGAGGACCTGATG<br>TCGACGTCGGCGGCGGCG | Generate pGBKT7 construct for RAD51A1                    |
| BD-RAD51A1-R     | TGCAGGTCGACGGATCCCCGGTCA<br>ATCCTTGACATCTGCAAC | Generate pGBKT7 construct for RAD51A1                    |
| BD-RAD51A2-F     | CTGATCTCAGAGGAGGACCTGATG<br>TCGTCGTCGGGTGCGGCT | Generate pGBKT7 construct for RAD51A2                    |
| BD-RAD51A2-R     | TGCAGGTCGACGGATCCCCGGTCA<br>GTCCTTAACATCTGTGAC | Generate pGBKT7 construct for RAD51A2                    |
| BD-DMC1A-F       | CTGATCTCAGAGGAGGACCTGATG<br>GCGCCGTCCAAGCAGTAC | Generate pGBKT7 construct for DMC1A                      |
| BD-DMC1A-R       | TGCAGGTCGACGGATCCCCGGTCA<br>GTCTTTCGCATCCATTAT | Generate pGBKT7 construct for DMC1A                      |
| BD-DMC1B-F       | CTGATCTCAGAGGAGGACCTGATG<br>GCGCCGTCCAAGCAGTAC | Generate pGBKT7 construct for DMC1B                      |
| BD-DMC1B-R       | TGCAGGTCGACGGATCCCCGGTCA<br>GTCTTTCGCATCCATTAT | Generate pGBKT7 construct for DMC1B                      |
| AD-BRCA2-F       | TACGACGTACCAGATTACGCTATGC<br>AGAGGAGGTGGCAGGTG | Generate pGADT7 construct for BRCA2                      |
| AD-BRCA2-R       | GTATCGATGCCCACCCGGGTGTCA<br>GCCACCACTGTCACCAAC | Generate pGADT7 construct for BRCA2                      |
| AD-FIGL1-F       | TACGACGTACCAGATTACGCTATGG<br>CGGAGCAGTCTCACGCC | Generate pGADT7 construct for FIGL1                      |
| AD-FIGL1-R       | GTATCGATGCCCACCCGGGTGTAA<br>TTTGCTAAGCTCCCAA   | Generate pGADT7 construct for FIGL1                      |
| SCC-RAD51A1-F    | GGGCCCAGGCCTACTAGTATGTCG<br>ACGTCGGCGGCG       | Generate pSCYCE(R) construct for RAD51A1                 |
| SCC-RAD51A1-R    | CTACCCGGGAGCGGTACCATCCTT<br>GACATCTGCAAC       | Generate pSCYCE(R) construct for RAD51A1                 |
| SCC-RAD51A2-F    | GGGCCCAGGCCTACTAGTATGTCG<br>TCGTCGGGTGCG       | Generate pSCYCE(R) construct for RAD51A2                 |

|               |                                          |                                             |
|---------------|------------------------------------------|---------------------------------------------|
| SCC-RAD51A2-R | CTACCCGGGAGCGGTACCGTCCTT<br>AACATCTGTGAC | Generate pSCYCE(R)<br>construct for RAD51A2 |
| SCC-DMC1A-F   | GGGCCCAGGCCTACTAGTATGGCG<br>CCGTCCAAGCAG | Generate pSCYCE(R)<br>construct for DMC1A   |
| SCC-DMC1A-R   | CTACCCGGGAGCGGTACCGTCTTT<br>CGCATCCATTAT | Generate pSCYCE(R)<br>construct for DMC1A   |
| SCC-DMC1B-F   | GGGCCCAGGCCTACTAGTATGGCG<br>CCGTCCAAGCAG | Generate pSCYCE(R)<br>construct for DMC1B   |
| SCC-DMC1B-R   | CTACCCGGGAGCGGTACCGTCTTT<br>CGCATCCATTAT | Generate pSCYCE(R)<br>construct for DMC1B   |
| SCN-FIGL1-F   | GGGCCCAGGCCTACTAGTATGGCG<br>GAGCAGTCTCAC | Generate pSCYNE(R)<br>construct for FIGL1   |
| SCN-FIGL1-R   | CTACCCGGGAGCGGTACCATTTGC<br>TAAGCTCCCAA  | Generate pSCYNE(R)<br>construct for FIGL1   |
| SCN-BRCA2-F   | GGGCCCAGGCCTACTAGTATGCAG<br>AGGAGGTGGCAG | Generate pSCYNE(R)<br>construct for BRCA2   |
| SCN-BRCA2-R   | CTACCCGGGAGCGGTACCGCCACC<br>ACTGTCACCAAC | Generate pSCYNE(R)<br>construct for BRCA2   |
